# Supplementary material
Source: PubMed Central journal article supplement (PMC9204618)
Supplement: jama-e229792-s00.pdf [file jama-e229792-s00.pdf]

## Data Sharing Statement

Russell. Effect of Fluid Bolus Administration on Cardiovascular Collapse Among Critically Ill Patients Undergoing Tracheal Intubation. *JAMA*. Published June 16, 2022.

doi:10.1001/jama.2022.9792

### Data

**Data available:** Yes

**Data types:** Deidentified participant data, Data dictionary

**How to access data:** [jonathan.d.casey@vumc.org](mailto:jonathan.d.casey@vumc.org)

**When available:** beginning date: 10-01-2022, end date: 10-01-2025

### Supporting Documents

**Document types:** None

### Additional Information

**Who can access the data:** Researchers whose proposed use of the data has been approved

**Types of analyses:** The data will be shared with researchers testing a hypothesis outlined in an institutional review board approved protocol.

**Mechanisms of data availability:** The data are made available without investigator support, after approval of a proposal, and with a signed data access agreement.
