# Supplementary material
Source: PubMed Central journal article supplement (PMC9204618)
Supplement: jama-e229792-s003.pdf [file jama-e229792-s003.pdf]

Supplemental Online Content: Nonauthor Collaborators

\*First name, last name, and suffix (if applicable) are required and will appear in PubMed.

| <b>*Group Name(s): PREPARE II Investigators</b> |                   |                              |                  |                                |                                          |                                                         |                                                                                            |
|-------------------------------------------------|-------------------|------------------------------|------------------|--------------------------------|------------------------------------------|---------------------------------------------------------|--------------------------------------------------------------------------------------------|
| <b>*First Name and Middle Initial(s)</b>        | <b>*Last Name</b> | <b>*Suffix (eg, Jr, III)</b> | Academic Degrees | Institution                    | Location (city, state/province, country) | Role or Contribution, eg, chair, principal investigator | Group (if more than 1 Group listed in the byline and/or Subgroup (eg, Steering Committee)) |
| Stephen P.                                      | Peters            |                              | MD, PhD          | Wake Forest School of Medicine | Winston-Salem, NC, USA                   | Collaborator                                            | PREPARE II Investigators                                                                   |
| Muhammad                                        | Ali               |                              | MBBS             | Wake Forest School of Medicine | Winston-Salem, NC, USA                   | Collaborator                                            | PREPARE II Investigators                                                                   |
| Rita N.                                         | Bakhru            |                              | MD, MS           | Wake Forest School of Medicine | Winston-Salem, NC, USA                   | Collaborator                                            | PREPARE II Investigators                                                                   |
| Scott                                           | Bauer             |                              | ANP-BC           | Wake Forest School of Medicine | Winston-Salem, NC, USA                   | Collaborator                                            | PREPARE II Investigators                                                                   |
| Christina R.                                    | Bellinger         |                              | MD               | Wake Forest School of Medicine | Winston-Salem, NC, USA                   | Collaborator                                            | PREPARE II Investigators                                                                   |
| Amanda M.                                       | Brown             |                              | PA-C             | Wake Forest School of Medicine | Winston-Salem, NC, USA                   | Collaborator                                            | PREPARE II Investigators                                                                   |
| Blair                                           | Brown             |                              | MD               | Wake Forest School of Medicine | Winston-Salem, NC, USA                   | Collaborator                                            | PREPARE II Investigators                                                                   |
| Jerri                                           | Brown             |                              | ADN, RN          | Wake Forest School of Medicine | Winston-Salem, NC, USA                   | Collaborator                                            | PREPARE II Investigators                                                                   |
| Caitlin                                         | Bumgarner         |                              | ACGNP            | Wake Forest School of Medicine | Winston-Salem, NC, USA                   | Collaborator                                            | PREPARE II Investigators                                                                   |
| Wendy                                           | Butcher           |                              | RN, BSN          | Wake Forest School of Medicine | Winston-Salem, NC, USA                   | Collaborator                                            | PREPARE II Investigators                                                                   |
| Megan                                           | Caudle            |                              | ACGNP            | Wake Forest School of Medicine | Winston-Salem, NC, USA                   | Collaborator                                            | PREPARE II Investigators                                                                   |
| Arjun B.                                        | Chatterjee        |                              | MD               | Wake Forest School of Medicine | Winston-Salem, NC, USA                   | Collaborator                                            | PREPARE II Investigators                                                                   |
| David J.                                        | Chodos            |                              | MD               | Wake Forest School of Medicine | Winston-Salem, NC, USA                   | Collaborator                                            | PREPARE II Investigators                                                                   |
| Gerardo                                         | Corcino           |                              | RN, BSN          | Wake Forest School of Medicine | Winston-Salem, NC, USA                   | Collaborator                                            | PREPARE II Investigators                                                                   |
| Nathan S.                                       | Cutler            |                              | MD               | Wake Forest School of Medicine | Winston-Salem, NC, USA                   | Collaborator                                            | PREPARE II Investigators                                                                   |
| Travis L.                                       | Dotson            |                              | MD               | Wake Forest School of Medicine | Winston-Salem, NC, USA                   | Collaborator                                            | PREPARE II Investigators                                                                   |

Supplemental Online Content: Nonauthor Collaborators

\*First name, last name, and suffix (if applicable) are required and will appear in PubMed.

| *First Name and Middle Initial(s) | *Last Name | *Suffix (eg, Jr, III) | Academic Degrees | Institution                    | Location (city, state/province, country) | Role or Contribution, eg, chair, principal investigator | Group (if more than 1 Group listed in the byline and/or Subgroup (eg, Steering Committee)) |
|-----------------------------------|------------|-----------------------|------------------|--------------------------------|------------------------------------------|---------------------------------------------------------|--------------------------------------------------------------------------------------------|
| Daniel C.                         | Files      |                       | MD               | Wake Forest School of Medicine | Winston-Salem, NC, USA                   | Collaborator                                            | PREPARE II Investigators                                                                   |
| Jonathan L.                       | Forbes     |                       | DO               | Wake Forest School of Medicine | Winston-Salem, NC, USA                   | Collaborator                                            | PREPARE II Investigators                                                                   |
| John P.                           | Gaillard   |                       | MD               | Wake Forest School of Medicine | Winston-Salem, NC, USA                   | Collaborator                                            | PREPARE II Investigators                                                                   |
| Katherine A.                      | Gershner   |                       | DO               | Wake Forest School of Medicine | Winston-Salem, NC, USA                   | Collaborator                                            | PREPARE II Investigators                                                                   |
| Shannon                           | Ginty      |                       | PA-C             | Wake Forest School of Medicine | Winston-Salem, NC, USA                   | Collaborator                                            | PREPARE II Investigators                                                                   |
| Kiadrick R.                       | Hood       |                       | RN, MSN, CMSRN   | Wake Forest School of Medicine | Winston-Salem, NC, USA                   | Collaborator                                            | PREPARE II Investigators                                                                   |
| April                             | Hazelwood  |                       | ADN, RN          | Wake Forest School of Medicine | Winston-Salem, NC, USA                   | Collaborator                                            | PREPARE II Investigators                                                                   |
| Katherine                         | Hendricks  |                       | FNP              | Wake Forest School of Medicine | Winston-Salem, NC, USA                   | Collaborator                                            | PREPARE II Investigators                                                                   |
| Kelly                             | Jacobus    |                       | PA-C             | Wake Forest School of Medicine | Winston-Salem, NC, USA                   | Collaborator                                            | PREPARE II Investigators                                                                   |
| Jonathan T.                       | Jaffe      |                       | MD               | Wake Forest School of Medicine | Winston-Salem, NC, USA                   | Collaborator                                            | PREPARE II Investigators                                                                   |
| Stacy                             | Kay        |                       | ACGNP            | Wake Forest School of Medicine | Winston-Salem, NC, USA                   | Collaborator                                            | PREPARE II Investigators                                                                   |
| Chad A.                           | Kloefkorn  |                       | MD               | Wake Forest School of Medicine | Winston-Salem, NC, USA                   | Collaborator                                            | PREPARE II Investigators                                                                   |
| Jennifer                          | Krall      |                       | MD               | Wake Forest School of Medicine | Winston-Salem, NC, USA                   | Collaborator                                            | PREPARE II Investigators                                                                   |
| Margo T.                          | Lannan     |                       | MD               | Wake Forest School of Medicine | Winston-Salem, NC, USA                   | Collaborator                                            | PREPARE II Investigators                                                                   |
| Cornelia                          | Lane       |                       | ACGNP            | Wake Forest School of Medicine | Winston-Salem, NC, USA                   | Collaborator                                            | PREPARE II Investigators                                                                   |
| Cynthia                           | Lanning    |                       | BSN, RN          | Wake Forest School of Medicine | Winston-Salem, NC, USA                   | Collaborator                                            | PREPARE II Investigators                                                                   |
| Jessica                           | Lyons      |                       | PA-C             | Wake Forest School of Medicine | Winston-Salem, NC, USA                   | Collaborator                                            | PREPARE II Investigators                                                                   |

## Supplemental Online Content: Nonauthor Collaborators

\*First name, last name, and suffix (if applicable) are required and will appear in PubMed.

| *First Name and Middle Initial(s) | *Last Name  | *Suffix (eg, Jr, III) | Academic Degrees | Institution                    | Location (city, state/province, country) | Role or Contribution, eg, chair, principal investigator | Group (if more than 1 Group listed in the byline and/or Subgroup (eg, Steering Committee)) |
|-----------------------------------|-------------|-----------------------|------------------|--------------------------------|------------------------------------------|---------------------------------------------------------|--------------------------------------------------------------------------------------------|
| William I.                        | Mariencheck | Jr.                   | MD               | Wake Forest School of Medicine | Winston-Salem, NC, USA                   | Collaborator                                            | PREPARE II Investigators                                                                   |
| Chad R.                           | Marion      |                       | DO, PhD          | Wake Forest School of Medicine | Winston-Salem, NC, USA                   | Collaborator                                            | PREPARE II Investigators                                                                   |
| Matthew A.                        | Maslonka    |                       | MD               | Wake Forest School of Medicine | Winston-Salem, NC, USA                   | Collaborator                                            | PREPARE II Investigators                                                                   |
| Sara                              | McClintock  |                       | ACGNP            | Wake Forest School of Medicine | Winston-Salem, NC, USA                   | Collaborator                                            | PREPARE II Investigators                                                                   |
| Nathaniel M.                      | Meier       |                       | MD               | Wake Forest School of Medicine | Winston-Salem, NC, USA                   | Collaborator                                            | PREPARE II Investigators                                                                   |
| Matthew C.                        | Miles       |                       | MD, Med          | Wake Forest School of Medicine | Winston-Salem, NC, USA                   | Collaborator                                            | PREPARE II Investigators                                                                   |
| Peter J.                          | Miller      |                       | MD               | Wake Forest School of Medicine | Winston-Salem, NC, USA                   | Collaborator                                            | PREPARE II Investigators                                                                   |
| Sophia                            | Mitchell    |                       | PA-C             | Wake Forest School of Medicine | Winston-Salem, NC, USA                   | Collaborator                                            | PREPARE II Investigators                                                                   |
| Wendy C.                          | Moore       |                       | MD               | Wake Forest School of Medicine | Winston-Salem, NC, USA                   | Collaborator                                            | PREPARE II Investigators                                                                   |
| Katherine                         | Moss        |                       | PA-C             | Wake Forest School of Medicine | Winston-Salem, NC, USA                   | Collaborator                                            | PREPARE II Investigators                                                                   |
| Andrew M.                         | Namen       |                       | MD               | Wake Forest School of Medicine | Winston-Salem, NC, USA                   | Collaborator                                            | PREPARE II Investigators                                                                   |
| Dustin L.                         | Norton      |                       | MD               | Wake Forest School of Medicine | Winston-Salem, NC, USA                   | Collaborator                                            | PREPARE II Investigators                                                                   |
| Stella B.                         | Ogake       |                       | MD               | Wake Forest School of Medicine | Winston-Salem, NC, USA                   | Collaborator                                            | PREPARE II Investigators                                                                   |
| Jill A.                           | Ohar        |                       | MD               | Wake Forest School of Medicine | Winston-Salem, NC, USA                   | Collaborator                                            | PREPARE II Investigators                                                                   |
| Victor E.                         | Ortega      |                       | MD, PhD          | Wake Forest School of Medicine | Winston-Salem, NC, USA                   | Collaborator                                            | PREPARE II Investigators                                                                   |
| Jessica A.                        | Palakshappa |                       | MD, MS           | Wake Forest School of Medicine | Winston-Salem, NC, USA                   | Collaborator                                            | PREPARE II Investigators                                                                   |
| Rodolfo M.                        | Pascual     |                       | MD               | Wake Forest School of Medicine | Winston-Salem, NC, USA                   | Collaborator                                            | PREPARE II Investigators                                                                   |

## Supplemental Online Content: Nonauthor Collaborators

\*First name, last name, and suffix (if applicable) are required and will appear in PubMed.

| *First Name and Middle Initial(s) | *Last Name  | *Suffix (eg, Jr, III) | Academic Degrees | Institution                          | Location (city, state/province, country) | Role or Contribution, eg, chair, principal investigator | Group (if more than 1 Group listed in the byline and/or Subgroup (eg, Steering Committee)) |
|-----------------------------------|-------------|-----------------------|------------------|--------------------------------------|------------------------------------------|---------------------------------------------------------|--------------------------------------------------------------------------------------------|
| Sandi                             | Pascual     |                       | ANP-BC           | Wake Forest School of Medicine       | Winston-Salem, NC, USA                   | Collaborator                                            | PREPARE II Investigators                                                                   |
| Aaron                             | Pickens     |                       | MD               | Wake Forest School of Medicine       | Winston-Salem, NC, USA                   | Collaborator                                            | PREPARE II Investigators                                                                   |
| Himanshu                          | Rawal       |                       | MBBS             | Wake Forest School of Medicine       | Winston-Salem, NC, USA                   | Collaborator                                            | PREPARE II Investigators                                                                   |
| Adam R                            | Schertz     |                       | MD               | Wake Forest School of Medicine       | Winston-Salem, NC, USA                   | Collaborator                                            | PREPARE II Investigators                                                                   |
| Matt                              | Strong      |                       | ADN, RN          | Wake Forest School of Medicine       | Winston-Salem, NC, USA                   | Collaborator                                            | PREPARE II Investigators                                                                   |
| Alexander O.                      | Sy          |                       | MD               | Wake Forest School of Medicine       | Winston-Salem, NC, USA                   | Collaborator                                            | PREPARE II Investigators                                                                   |
| Braghadheeswar                    | Thyagarajan |                       | MD               | Wake Forest School of Medicine       | Winston-Salem, NC, USA                   | Collaborator                                            | PREPARE II Investigators                                                                   |
| Amy                               | Townsend    |                       | ACGNP            | Wake Forest School of Medicine       | Winston-Salem, NC, USA                   | Collaborator                                            | PREPARE II Investigators                                                                   |
| Russell                           | Worthen     |                       | FNP-BC           | Wake Forest School of Medicine       | Winston-Salem, NC, USA                   | Collaborator                                            | PREPARE II Investigators                                                                   |
| Michael                           | Wlodarski   |                       | PA-C             | Wake Forest School of Medicine       | Winston-Salem, NC, USA                   | Collaborator                                            | PREPARE II Investigators                                                                   |
| Charles                           | Yarbrough   |                       | ADN, RN          | Wake Forest School of Medicine       | Winston-Salem, NC, USA                   | Collaborator                                            | PREPARE II Investigators                                                                   |
| Caroline                          | York        |                       | PA-C             | Wake Forest School of Medicine       | Winston-Salem, NC, USA                   | Collaborator                                            | PREPARE II Investigators                                                                   |
| Bradley                           | Lloyd       |                       | RRT-ACCS         | Vanderbilt University Medical Center | Nashville, TN, USA                       | Collaborator                                            | PREPARE II Investigators                                                                   |
| Christopher                       | Adler       |                       | PA-C             | Lahey Hospital and Medical Center    | Burlington, MA, USA                      | Collaborator                                            | PREPARE II Investigators                                                                   |
| Ahmed                             | Agameya     |                       | MD               | Lahey Hospital and Medical Center    | Burlington, MA, USA                      | Collaborator                                            | PREPARE II Investigators                                                                   |
| Michael                           | Colancecco  |                       | DO               | Lahey Hospital and Medical Center    | Burlington, MA, USA                      | Collaborator                                            | PREPARE II Investigators                                                                   |
| Daniel                            | Fitelson    |                       | MD               | Lahey Hospital and Medical Center    | Burlington, MA, USA                      | Collaborator                                            | PREPARE II Investigators                                                                   |
| Joshua                            | Giacotto    |                       | MD               | Lahey Hospital and Medical Center    | Burlington, MA, USA                      | Collaborator                                            | PREPARE II Investigators                                                                   |

## Supplemental Online Content: Nonauthor Collaborators

\*First name, last name, and suffix (if applicable) are required and will appear in PubMed.

| *First Name and Middle Initial(s) | *Last Name | *Suffix (eg, Jr, III) | Academic Degrees | Institution                       | Location (city, state/province, country) | Role or Contribution, eg, chair, principal investigator | Group (if more than 1 Group listed in the byline and/or Subgroup (eg, Steering Committee)) |
|-----------------------------------|------------|-----------------------|------------------|-----------------------------------|------------------------------------------|---------------------------------------------------------|--------------------------------------------------------------------------------------------|
| Gena                              | Han        |                       | DO               | Lahey Hospital and Medical Center | Burlington, MA, USA                      | Collaborator                                            | PREPARE II Investigators                                                                   |
| Louise                            | Kane       |                       | MD               | Lahey Hospital and Medical Center | Burlington, MA, USA                      | Collaborator                                            | PREPARE II Investigators                                                                   |
| Ezra                              | Miller     |                       | MD               | Lahey Hospital and Medical Center | Burlington, MA, USA                      | Collaborator                                            | PREPARE II Investigators                                                                   |
| Timothy                           | Noland     |                       | PA-C             | Lahey Hospital and Medical Center | Burlington, MA, USA                      | Collaborator                                            | PREPARE II Investigators                                                                   |
| Jaqueline                         | Price      |                       | PA-C             | Lahey Hospital and Medical Center | Burlington, MA, USA                      | Collaborator                                            | PREPARE II Investigators                                                                   |
| Joseph                            | Plourde    |                       | PA-C             | Lahey Hospital and Medical Center | Burlington, MA, USA                      | Collaborator                                            | PREPARE II Investigators                                                                   |
| Emily                             | Adams      |                       | PA-C             | Lahey Hospital and Medical Center | Burlington, MA, USA                      | Collaborator                                            | PREPARE II Investigators                                                                   |
| Fraser                            | Mackay     |                       | MD               | Lahey Hospital and Medical Center | Burlington, MA, USA                      | Collaborator                                            | PREPARE II Investigators                                                                   |
| Laura                             | Mahoney    |                       | PA-C             | Lahey Hospital and Medical Center | Burlington, MA, USA                      | Collaborator                                            | PREPARE II Investigators                                                                   |
| Avignat                           | Patel      |                       | MD               | Lahey Hospital and Medical Center | Burlington, MA, USA                      | Collaborator                                            | PREPARE II Investigators                                                                   |
| Michael                           | Plourde    |                       | PA-C             | Lahey Hospital and Medical Center | Burlington, MA, USA                      | Collaborator                                            | PREPARE II Investigators                                                                   |
| Zena                              | Saadeh     |                       | PA-C             | Lahey Hospital and Medical Center | Burlington, MA, USA                      | Collaborator                                            | PREPARE II Investigators                                                                   |
| Sara                              | Shadchehr  |                       | DO               | Lahey Hospital and Medical Center | Burlington, MA, USA                      | Collaborator                                            | PREPARE II Investigators                                                                   |
| Sandeep                           | Somalaraju |                       | MD               | Lahey Hospital and Medical Center | Burlington, MA, USA                      | Collaborator                                            | PREPARE II Investigators                                                                   |
| Eleanor                           | Summerhill |                       | MD               | Lahey Hospital and Medical Center | Burlington, MA, USA                      | Collaborator                                            | PREPARE II Investigators                                                                   |
| Ryan                              | Webster    |                       | MD               | Lahey Hospital and Medical Center | Burlington, MA, USA                      | Collaborator                                            | PREPARE II Investigators                                                                   |
| Jordan                            | Winnicki   |                       | PA-C             | Lahey Hospital and Medical Center | Burlington, MA, USA                      | Collaborator                                            | PREPARE II Investigators                                                                   |

## Supplemental Online Content: Nonauthor Collaborators

\*First name, last name, and suffix (if applicable) are required and will appear in PubMed.

| *First Name and Middle Initial(s) | *Last Name | *Suffix (eg, Jr, III) | Academic Degrees | Institution                                        | Location (city, state/province, country) | Role or Contribution, eg, chair, principal investigator | Group (if more than 1 Group listed in the byline and/or Subgroup (eg, Steering Committee)) |
|-----------------------------------|------------|-----------------------|------------------|----------------------------------------------------|------------------------------------------|---------------------------------------------------------|--------------------------------------------------------------------------------------------|
| Ekaterina                         | Yavarovich |                       | DO               | Lahey Hospital and Medical Center                  | Burlington, MA, USA                      | Collaborator                                            | PREPARE II Investigators                                                                   |
| Anna                              | Altz-Stamm |                       | RN, BSN, CCRN    | University of Alabama at Birmingham                | Birmingham, AL, USA                      | Collaborator                                            | PREPARE II Investigators                                                                   |
| Cristina                          | Bardita    |                       | MD, PhD          | University of Alabama at Birmingham Medical Center | Birmingham, AL, USA                      | Collaborator                                            | PREPARE II Investigators                                                                   |
| Mary Clay                         | Boone      |                       | RN, BSN          | University of Alabama at Birmingham Medical Center | Birmingham, AL, USA                      | Collaborator                                            | PREPARE II Investigators                                                                   |
| Joe W.                            | Chiles     | III                   | MD               | University of Alabama at Birmingham Medical Center | Birmingham, AL, USA                      | Collaborator                                            | PREPARE II Investigators                                                                   |
| Kristina                          | Collins    |                       | RN, BSN          | University of Alabama at Birmingham Medical Center | Birmingham, AL, USA                      | Collaborator                                            | PREPARE II Investigators                                                                   |
| Abby                              | Drescher   |                       | RN, BSN          | University of Alabama at Birmingham Medical Center | Birmingham, AL, USA                      | Collaborator                                            | PREPARE II Investigators                                                                   |
| Kevin G.                          | Dsouza     |                       | MD               | University of Alabama at Birmingham Medical Center | Birmingham, AL, USA                      | Collaborator                                            | PREPARE II Investigators                                                                   |
| Janna                             | Dunn       |                       | RN, ADN          | University of Alabama at Birmingham Medical Center | Birmingham, AL, USA                      | Collaborator                                            | PREPARE II Investigators                                                                   |
| Stacy                             | Ejem       |                       | MD               | University of Alabama at Birmingham Medical Center | Birmingham, AL, USA                      | Collaborator                                            | PREPARE II Investigators                                                                   |
| Josh                              | Gautney    |                       | MD               | University of Alabama at Birmingham Medical Center | Birmingham, AL, USA                      | Collaborator                                            | PREPARE II Investigators                                                                   |
| Nicole                            | Harris     |                       | RN, ADN          | University of Alabama at Birmingham Medical Center | Birmingham, AL, USA                      | Collaborator                                            | PREPARE II Investigators                                                                   |
| Savannah                          | Herder     |                       | RN, BSN          | University of Alabama at Birmingham Medical Center | Birmingham, AL, USA                      | Collaborator                                            | PREPARE II Investigators                                                                   |
| Tamer                             | Hudali     |                       | MD, MPH          | University of Alabama at Birmingham Medical Center | Birmingham, AL, USA                      | Collaborator                                            | PREPARE II Investigators                                                                   |
| R. Chad                           | Wade       |                       | MD               | University of Alabama at Birmingham Medical Center | Birmingham, AL, USA                      | Collaborator                                            | PREPARE II Investigators                                                                   |
| Rutwij                            | Joshi      |                       | MBBS             | University of Alabama at Birmingham Medical Center | Birmingham, AL, USA                      | Collaborator                                            | PREPARE II Investigators                                                                   |
| Daniel                            | Kelmenson  |                       | MD               | University of Alabama at Birmingham Medical Center | Birmingham, AL, USA                      | Collaborator                                            | PREPARE II Investigators                                                                   |
| Anne Merrill                      | Mason      |                       | RN, BSN          | University of Alabama at Birmingham Medical Center | Birmingham, AL, USA                      | Collaborator                                            | PREPARE II Investigators                                                                   |

## Supplemental Online Content: Nonauthor Collaborators

\*First name, last name, and suffix (if applicable) are required and will appear in PubMed.

| *First Name and Middle Initial(s) | *Last Name  | *Suffix (eg, Jr, III) | Academic Degrees | Institution                                             | Location (city, state/province, country) | Role or Contribution, eg, chair, principal investigator | Group (if more than 1 Group listed in the byline and/or Subgroup (eg, Steering Committee)) |
|-----------------------------------|-------------|-----------------------|------------------|---------------------------------------------------------|------------------------------------------|---------------------------------------------------------|--------------------------------------------------------------------------------------------|
| Scott R.                          | Merriman    |                       | MD               | University of Alabama at Birmingham Medical Center      | Birmingham, AL, USA                      | Collaborator                                            | PREPARE II Investigators                                                                   |
| Takudzwa                          | Mkorombindo |                       | MD               | University of Alabama at Birmingham Medical Center      | Birmingham, AL, USA                      | Collaborator                                            | PREPARE II Investigators                                                                   |
| Megan                             | Moore       |                       | RN, MSN          | University of Alabama at Birmingham Medical Center      | Birmingham, AL, USA                      | Collaborator                                            | PREPARE II Investigators                                                                   |
| Jada                              | Nowak       |                       | RN, BSN          | University of Alabama at Birmingham Medical Center      | Birmingham, AL, USA                      | Collaborator                                            | PREPARE II Investigators                                                                   |
| Kate                              | O'Connor    |                       | DO               | University of Alabama at Birmingham Medical Center      | Birmingham, AL, USA                      | Collaborator                                            | PREPARE II Investigators                                                                   |
| David B.                          | Page        |                       | MD               | University of Alabama at Birmingham Medical Center      | Birmingham, AL, USA                      | Collaborator                                            | PREPARE II Investigators                                                                   |
| Sheylan D.                        | Patel       |                       | MD               | University of Alabama at Birmingham Medical Center      | Birmingham, AL, USA                      | Collaborator                                            | PREPARE II Investigators                                                                   |
| G. Bruno                          | Pereira     |                       | MD, PhD          | University of Alabama at Birmingham Medical Center      | Birmingham, AL, USA                      | Collaborator                                            | PREPARE II Investigators                                                                   |
| Lisa                              | Sarratt     |                       | RN, BSN          | University of Alabama at Birmingham Medical Center      | Birmingham, AL, USA                      | Collaborator                                            | PREPARE II Investigators                                                                   |
| Tabitha                           | Stewart     |                       | RN, BSN          | University of Alabama at Birmingham Medical Center      | Birmingham, AL, USA                      | Collaborator                                            | PREPARE II Investigators                                                                   |
| William S.                        | Stigler     |                       | MD               | University of Alabama at Birmingham Medical Center      | Birmingham, AL, USA                      | Collaborator                                            | PREPARE II Investigators                                                                   |
| Kadambari                         | Vijaykumar  |                       | MBBS             | University of Alabama at Birmingham Medical Center      | Birmingham, AL, USA                      | Collaborator                                            | PREPARE II Investigators                                                                   |
| Gina                              | White       |                       | RN, BSN          | University of Alabama at Birmingham Medical Center      | Birmingham, AL, USA                      | Collaborator                                            | PREPARE II Investigators                                                                   |
| Micah R.                          | Whitson     |                       | MD               | University of Alabama at Birmingham Medical Center      | Birmingham, AL, USA                      | Collaborator                                            | PREPARE II Investigators                                                                   |
| Katherine O.                      | Heller      |                       | MD               | University of Washington Harborview                     | Seattle, WA, USA                         | Collaborator                                            | PREPARE II Investigators                                                                   |
| C. Cole                           | Malibiran   |                       | BS               | Oregon Health and Science University School of Medicine | Portland, OR, USA                        | Collaborator                                            | PREPARE II Investigators                                                                   |
| Milad K.                          | Jouzevani   |                       |                  | Oregon Health and Science University School of Medicine | Portland, OR, USA                        | Collaborator                                            | PREPARE II Investigators                                                                   |
| Chandani Anandkat Zachary         | Zouyed      |                       | BS               | Oregon Health and Science University School of Medicine | Portland, OR, USA                        | Collaborator                                            | PREPARE II Investigators                                                                   |

Supplemental Online Content: Nonauthor Collaborators

\*First name, last name, and suffix (if applicable) are required and will appear in PubMed.

| *First Name and Middle Initial(s) | *Last Name | *Suffix (eg, Jr, III) | Academic Degrees | Institution                                             | Location (city, state/province, country) | Role or Contribution, eg, chair, principal investigator | Group (if more than 1 Group listed in the byline) and/or Subgroup (eg, Steering Committee) |
|-----------------------------------|------------|-----------------------|------------------|---------------------------------------------------------|------------------------------------------|---------------------------------------------------------|--------------------------------------------------------------------------------------------|
| Matthew G.                        | Drake      |                       | MD               | Oregon Health and Science University School of Medicine | Portland, OR, USA                        | Collaborator                                            | PREPARE II Investigators                                                                   |
| Makrina N.                        | Kamel      |                       | BS               | Oregon Health and Science University School of Medicine | Portland, OR, USA                        | Collaborator                                            | PREPARE II Investigators                                                                   |
